# Supplementary material for: IFN-γ mediates Paneth cell death via suppression of mTOR
Source: eLife. 2021 Oct 11;10:e60478. doi: 10.7554/eLife.60478 (PMC8570691; doi:10.7554/eLife.60478)
Supplement: Figure 1—source data 1. — Figure 1A: qRT-PCR analysis of relative Lyz1, Defa23, and Defa24 expression measured in the small intestines of WT, E-Ifngr2 KO, and PC- Ifngr2 KO infected orally with 20 cysts per mouse of the ME49 T. gondii on day 7 after infection. Figure 1C: Quantification of Paneth cells per crypt in naïve and infected WT, E- Ifngr2 KO, and PC- Ifngr2 KO mice with 20 cysts of ME49 T. gondii on day 7. Figure 1F: numbers of PI+ puncta per crypt in the small intestines of WT, E-Ifngr2 KO, and PC- Ifngr2 KO infected orally with 20 cysts per mouse of the ME49 T. gondii on day 7 after infection. [file elife-60478-fig1-data1.xlsx]

## Sheet: Figure 1A Lys1
Naive	D7	Vil-Cre Naive	Vil-Cre D7	PC Cre Naive	PC Cre D7
0.95	0.01	0.65	0.24	0.59	0.16
1.19	0	0.72	0.13	0.75	0.48
0.53	0	0.79	0.88	1.05	0.52
1.08	0	1	0.26	0.92	0.33
1.1	0	0.31	0.43	1.01	0.82
1.15	0	1	0.54	0.32	0.45
	0		0.23		0.2

## Sheet: Figure 1A Defa23
WT Naive	WT D7	Vil-Cre Naive	Vil-Cre D7	PC-Cre Naive	PC-Cre D7
0.61	0.01	1	1.36	1.65	0.3
1.65	0.09	0.84	0.33	0.45	0.4
0.86	0.05	1	0.78	1.07	0.39
0.93	0.01	1.11	0.35	0.94	0.36
1	0.02	1	0.51	1	0.49
1	0	1	0.49	0.8	0.65
	0.01		1.03		1.05

## Sheet: Figure 1A Defa24
Naive	D7	Vil-Cre Naive	Vil-Cre D7	PC Cre Naive	PC Cre D7
1	0.01	0.6	0.14	0.6	0.24
1.14	0.01	0.77	0.19	0.85	0.38
0.93	0	0.79	0.98	1.28	0.91
0.68	0	1	0.36	1.01	0.5
1	0	0.51	0.58	0.69	0.48
1.25	0	1	0.86	0.93	0.72
	0.01		0.3		0.45

## Sheet: Figure 1C
WT Naive	E-IFNgRII KO Naive	PC-IFNgRII KO Naive	WT D7	E-IFNgRII KO D7	PC-IFNgRII D7
10	5	7	0	7	5
8	4	7	0	9	1
6	3	3	0	7	6
6	2	6	0	7	5
7	5	7	1	9	6
7	3	6	0	4	7
4	7	5	0	7	2
6	8	7	0	9	2
5	10	6	0	9	2
8	10	2	0	5	7
6	9	5	0	9	8
6	10	6	0	6	2
6	11	3	1	7	3
5	7	5	0	7	4
8	5	7	0	8	4
6	5	6	2	7	4
2	6	8	0	7	3
8	4	4	0	2	1
7	7	6	0	3	1
3	2	6	0	1	2
7	3	9	1	3	2
2	4	8	0	6	3
6	5	5	0	5	1
6	6	5	0	1	6
7	9	4	1	2	6
4	5	5	0	1	5
5	7	6	0	3	6
8	3	5	2	2	6
6	9	5	0	3	6
6	5	3	0	1	6

## Sheet: Figure 1F
	Naive WT	Naive Villin Cre	Naive PC-Cre	D6 WT	D6 Villin Cre	D6 PC-Cre
Crypts	0.823529	0.761905	0.637931	3.03333	0.905109	0.45
	0.302277	0.2	0.3	2.80952	1.30081	1.46364
	0.1	0.15	0.6	2.96	1.03349	1.18367
				4	1.15	0.642857
