# Supplementary material for: IFN-γ mediates Paneth cell death via suppression of mTOR
Source: eLife. 2021 Oct 11;10:e60478. doi: 10.7554/eLife.60478 (PMC8570691; doi:10.7554/eLife.60478)
Supplement: Figure 3—source data 1. — Figure 3B qRT-PCR analysis for the relative Lyz1 expression in small intestines of naïve and T. gondii-infected mice on days 3, 5, and 7 post infection. Figure 3C: qRT-PCR analysis for the relative IFN-γ and Irgm1 expression in small intestines of naïve and T. gondii-infected mice on days 3, 5, and 7 post infection. Figure 3E Mean fluorescent intensity of p-Ser 240/244 channel in individual intestinal sections of T. gondii-infected WT, E-ifngr2 KO, and PC-ifngr2 KO mice on day 7 post infection. [file elife-60478-fig3-data1.xlsx]

## Sheet: Figure 3B
Naive	Naive + anti-IFN-γ	D3	D3 + anti-IFN-g	D5	D5 + anti-IFN-g	D7	D7 + anti-IFN-g
1.59	1.52	0.39	1.52	0.27	1.54	0.02	1.07
0.98	1.02	0.21	1.2	0.07	0.45	0.03	1.1
1.03	0.78	0.44	1.6	0.33	1.32	0.09	1.75

## Sheet: Figure 3C Ifng
Naive	Naive + anti-IFN-γ	D3	D3 + anti-IFN-g	D5	D5 + anti-IFN-g	D7	D7 + anti-IFN-g
2.62	0.23	33	38	94.9	85.53	82	126
0.69	0.7	31	45	75.23	126.09	87.33	71
0.55	0.88	19	74	85	105	76.29	135

## Sheet: Figure 3C Irgm1
Naive	Naive + anti-IFN-γ	D3	D3 + anti-IFN-g	D5	D5 + anti-IFN-g	D7	D7 + anti-IFN-g
2	2	25	0.2	27.79	0.9	45	1.76
1.06	1.15	10.5	0.15	35.12	1.15	32	3.46
0.47	0.35	10.68	3	14.25	0.99	49	0.15

## Sheet: Figure 3E
Naive	D7	Vil-Cre Naive	Vil-Cre D7	PC Cre Naive	PC Cre D7
255	55	395	254	196	155
190	26	365	340	147	140
315	45	240	155	215	100
			46
