# Supplementary material for: IFN-γ mediates Paneth cell death via suppression of mTOR
Source: eLife. 2021 Oct 11;10:e60478. doi: 10.7554/eLife.60478 (PMC8570691; doi:10.7554/eLife.60478)
Supplement: Figure 4—source data 1. — Figure 4A: the serum levels of IFN-γ were analyzed by ELISA in comparison to Toxoplasma gondii-infected mice on day 7 post infection. Figure 4B qRT-PCR analysis for the relative Defa24 and Lyz1 expression in small intestines of mice treated with recombinant IFN-γ. Figure 4F: The frequency and absolute numbers of mTOR+ Paneth cells in control and IFN-γ treated mice. [file elife-60478-fig4-data1.xlsx]

## Sheet: Figure 4A
Naive	D1 IFN-γ	D2 IFN-γ	D3 IFN-γ	T. gondii 7 d.p.i.
0	2.97	1.58	3.84	5.61
0	2.84	3.58	4.17	4
0	3.71	4.2	5.53	5.99
0.089		4.81	4.73	7.46
0.108			6.49

## Sheet: Figure 4B Defa24
Naive	D1 IFN-γ	D2 IFN-γ	D3 IFN-γ
1.98	0.31	0.14	0
1.35	0.15	0.34	0
0.62	0.27	0.01	0.03
0.33	0	0	0
0.93

## Sheet: Figure 4B Lys1
Naive	D1 IFN-γ	D2 IFN-γ	D3 IFN-γ
1.51	0.31	0.16	0.01
1.58	0.15	0.35	0
1.34	0.28	0.01	0.03
0.73	0	0	0
0.35

## Sheet: Figure 4F
TOP
Naive	IFN-γ in vivo
91	27.5
83.5	16.2
92	36.3
89.3	15.9
BOTTOM
Naive	IFN-γ in vivo
656200	16250
609380	8940
183770	6600
161730	2210
