# Supplementary material for: IFN-γ mediates Paneth cell death via suppression of mTOR
Source: eLife. 2021 Oct 11;10:e60478. doi: 10.7554/eLife.60478 (PMC8570691; doi:10.7554/eLife.60478)
Supplement: Figure 5—source data 1. — Figure 5B qRT-PCR analysis of Lyz1, Defa23, and Defa24 relative expression in the small intestines of WT mice and mice lacking Raptor or mTOR in Paneth cells. Figure 5D qRT-PCR analysis for relative Lyz1, Defa23, and Defa24 expression in the small intestines in WT mice treated with rapamycin daily for 24 hr (D1) or 72 hr (D3). WT, wild-type. [file elife-60478-fig5-data1.xlsx]

## Sheet: Figure 5B Lys1
WT	PC-Raptor KO	PC-mTOR KO
1.3	0.24	0.22
1.36	0.21	0
0.69	0.29	0.02
0.83	0.11	0.01

## Sheet: Figure 5B Defa23
WT	PC-Raptor KO	PC-mTOR KO
1.02	0.1	0.08
0.98	0.36	0.01
1	0.46	0.22
1	0.43	0.15

## Sheet: Figure 5B Defa24
WT	PC-Raptor KO	PC-mTOR KO
0.93	0.1	0.1
1.08	0.53	0.03
0.98	0.51	0.23
1.02	0.23	0.18

## Sheet: Figure 5D Lys1
Naive	D1	D3
1.5	0.29	0.08
0.58	0.44	0.4
1.21	0.81	0.1
1.2	0.06	0.01

## Sheet: Figure 5D Defa23
Naive	D1	D3
1.15	0.41	0.08
1.02	0.49	0.26
0.64	0.42	0.35
1.22	0.38	0.25
	0.24	0.41

## Sheet: Figure 5D Defa24
Naive	D1	D3
1.42	0.47	0.07
0.97	0.47	0.32
1.07	0.32	0.25
1.04	0.46	0.15
	0.78	0.1
