# Supplementary material for: IFN-γ mediates Paneth cell death via suppression of mTOR
Source: eLife. 2021 Oct 11;10:e60478. doi: 10.7554/eLife.60478 (PMC8570691; doi:10.7554/eLife.60478)
Supplement: Figure 6—source data 1. — Figure 6B Flow cytometric quantification of mitostatus and mitotracker positive Paneth cells in naïve or Toxoplasma gondii-infected PC-Cre x Rosa-YFP reporter mice on day 5 post infection. Figure 6E: MitoStatus MFI of the individual intestinal organoids treated with IFN-γ in vitro for 24 hr. Figure 6F: qRT-PCR analysis for relative Defa23 expression in organoids stimulated with IFN-γ (200 ng/ml) for 24 hr. Figure 6H: qRT-PCR analysis for relative Defa23 and Olfm4 expression in PC-Cre x TdTomato organoids stimulated with IFN-γ(200 ng/ml), Rapamycin (500 nM) or FCCP (100 µM) for 6 hr. MFI, mean fluorescence intensity. [file elife-60478-fig6-data1.xlsx]

## Sheet: Figure 6B
Naive	5 d.p.i.		Naive	5 d.p.i.
5097000	61000		61.7	37.5
2257000	9600		72.5	41.5
2879000	2600		80.2	42.9
8563000	82890		82	54.6
	98450

## Sheet: Figure 6E
Control	IFN-γ
348	55
499	26
285	54
415	51
455	26
352	55
175	55
55	55
145	54
195	51

## Sheet: Figure 6F
Control	IFN-γ
0.95	0.17
0.87	0.2
1.23	0.58
1.05	0.67
0.95	0.19
1.2	0.08

## Sheet: Figure 6H Defa23
Naive	IFN-γ	FCCP	Rapa
1.25	0.05	0	0.01
1.5	0.17	0.02	0.02
0.5	0.01	0	0
1	0.06	0	0.03
0.75	0.21	0.01	0.01

## Sheet: Figure 6H Olfm4
Naive	IFN-γ	FCCP	Rapa
1.2	0.04	0.02	1.14
0.8	0.07	1.64	0.7
0.98	0.21	0.3	0.11
0.45	0.01	0.21	1
1.55	0	0.01	0.25
