# Supplementary material for: IFN-γ mediates Paneth cell death via suppression of mTOR
Source: eLife. 2021 Oct 11;10:e60478. doi: 10.7554/eLife.60478 (PMC8570691; doi:10.7554/eLife.60478)
Supplement: Figure 7—source data 1. — Figure 7A: qRT-PCR analysis for relative expression of Lyz1, Defa23, and Defa24 measured in the small intestines of conventional (CONV) and germ-free (GF) C57Bl/6 mice infected orally with 20 cysts of the ME49 T. gondii (day 7 post infection). Figure 7C: MFI quantification of p-Ser240/244 channel in individual intestinal sections of T. gondii-infected WT CONV and GF mice on day 7 post infection. MFI, mean fluorescence intensity; WT, wild-type. [file elife-60478-fig7-data1.xlsx]

## Sheet: Figure 7A Lys1
G.F. Naive	G.F. 7 d.p.i.	Conv. Naive	Conv. 7 d.p.i.
1.64	0.61	0.68	0.06
0.46	0.6	1.21	0.18
0.32	0.64	1.11	0.02
0.84	0.38		0
0.48

## Sheet: Figure 7A Defa23
G.F. Naive	G.F. 7 d.p.i.	Conv. Naive	Conv. 7 d.p.i.
1.81	0.62	0.75	0.14
0.44	0.47	1.23	0.09
0.53	0.48	1	0.13
0.66	0.41		0
0.49

## Sheet: Figure 7A Defa24
G.F. Naive	G.F. 7 d.p.i.	Conv. Naive	Conv. 7 d.p.i.
1.73	0.72	0.98	0.03
0.38	0.23	1.32	0.19
0.61	0.54	0.71	0.04
0.53	0.43		0
0.36

## Sheet: Figure 7C
G.F. Naive	G.F. 7 d.p.i.	Conv. Naive	Conv. 7 d.p.i.
330	325	335	55
456	425	454	55
255	155	395	26
155	164
