# Supplementary figures and images for: IFN-γ mediates Paneth cell death via suppression of mTOR
Source: eLife journal article supplement (doi:10.7554/elife.60478), 2021-10-11

Figure 3- figure supplement 1

A

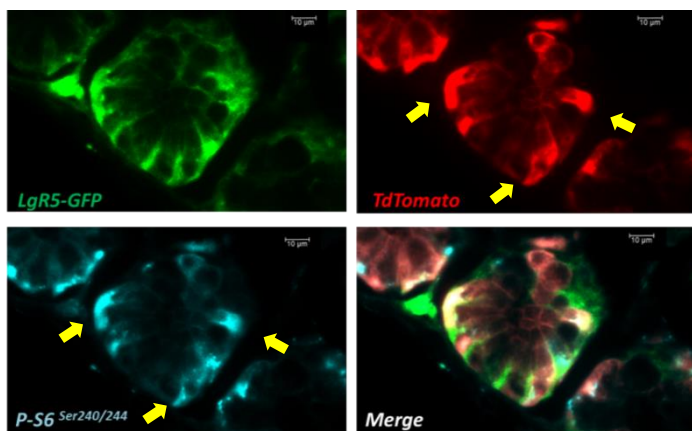

B

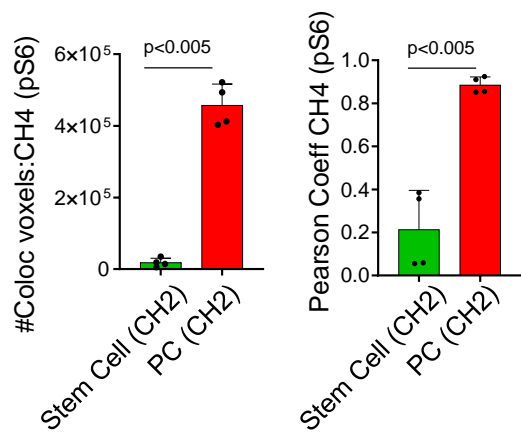

Supplement: supp [file elife-60478-supp-v1.zip]

Figure 7 - figure supplement 1

A

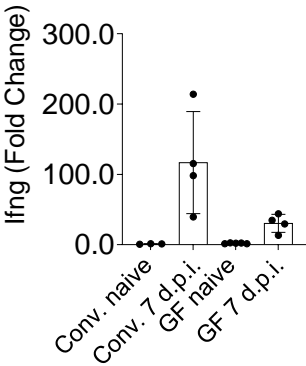

B

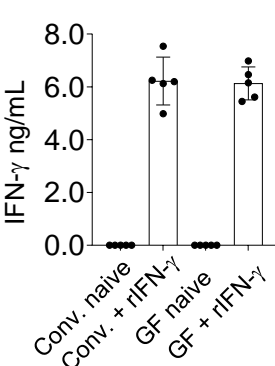

C

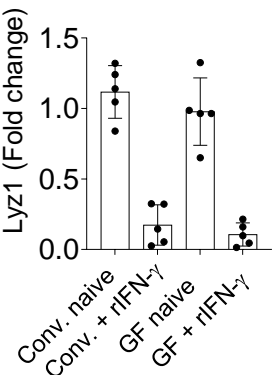

Supplement: supp [file elife-60478-supp-v1.zip]

**Figure 5 - figure supplement 1**

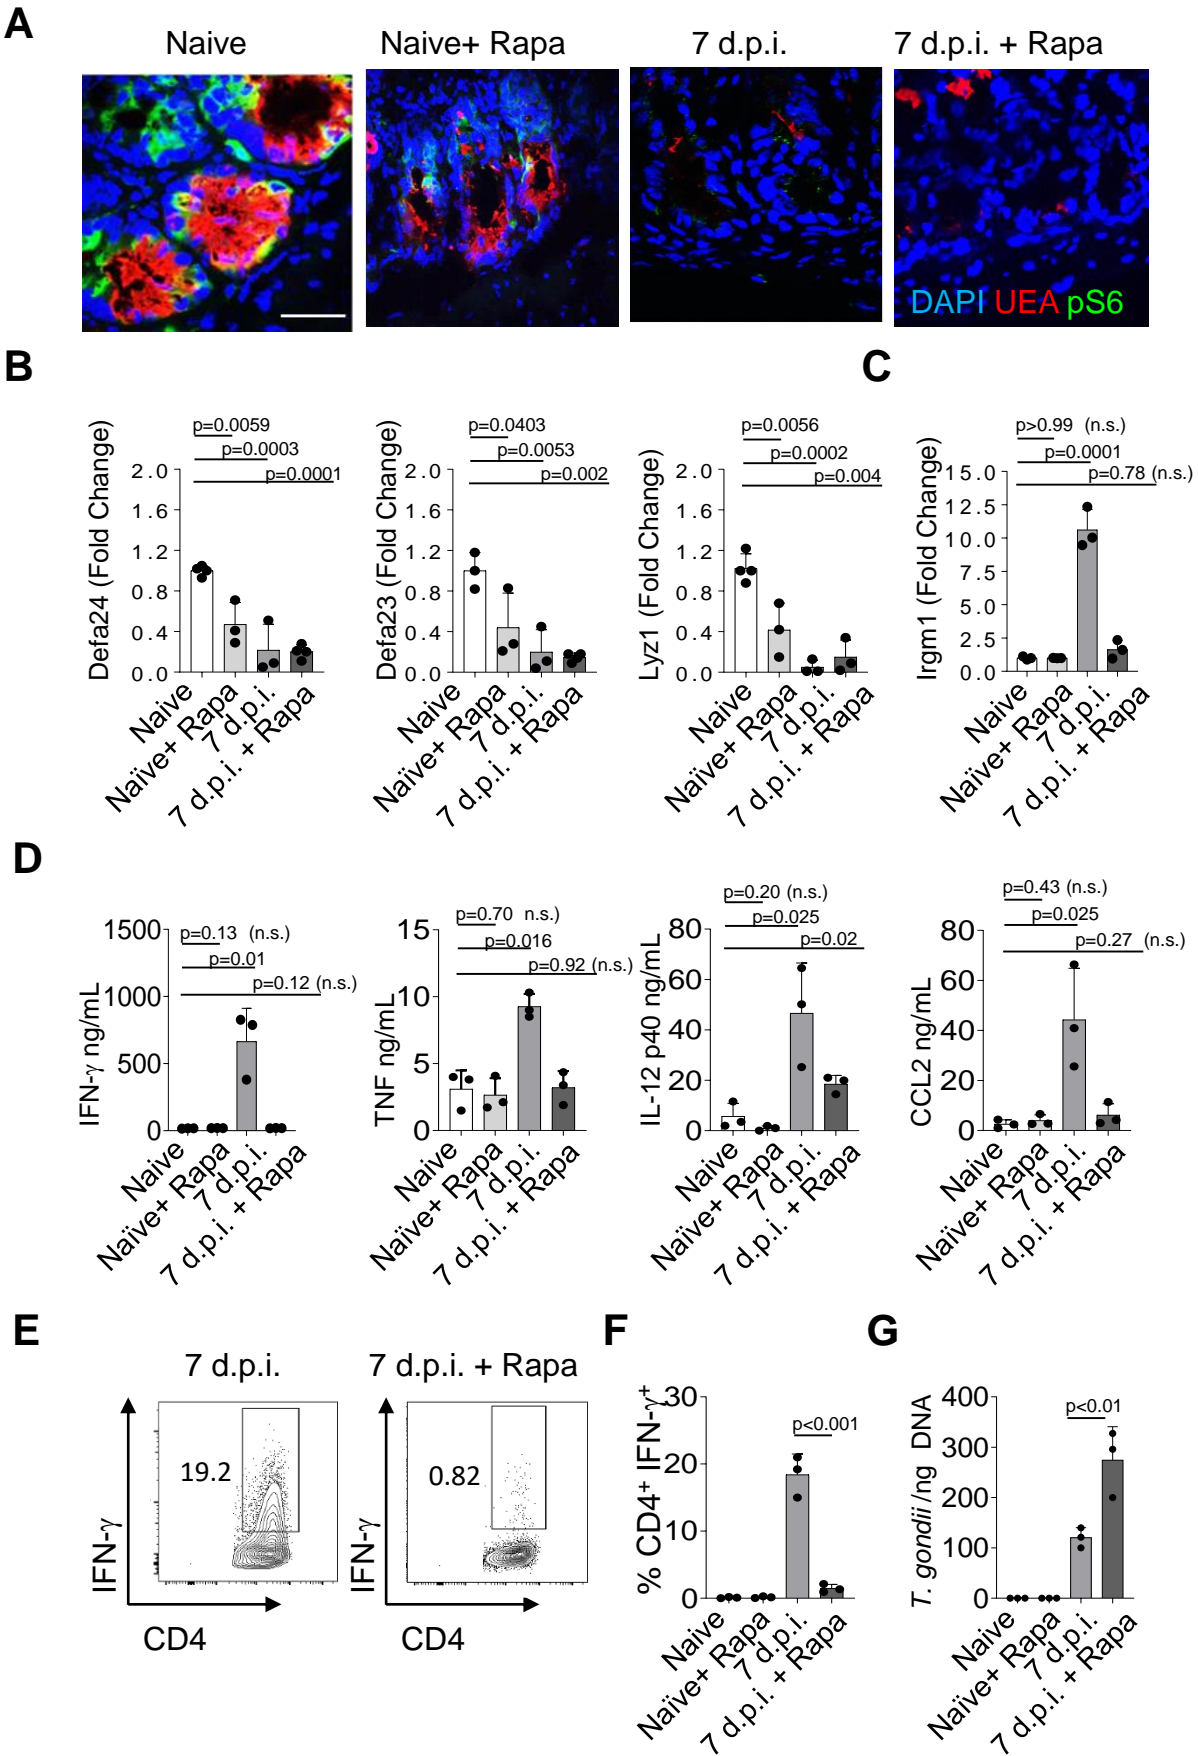

Supplement: supp [file elife-60478-supp-v1.zip]

**Figure 2- figure supplement 2**

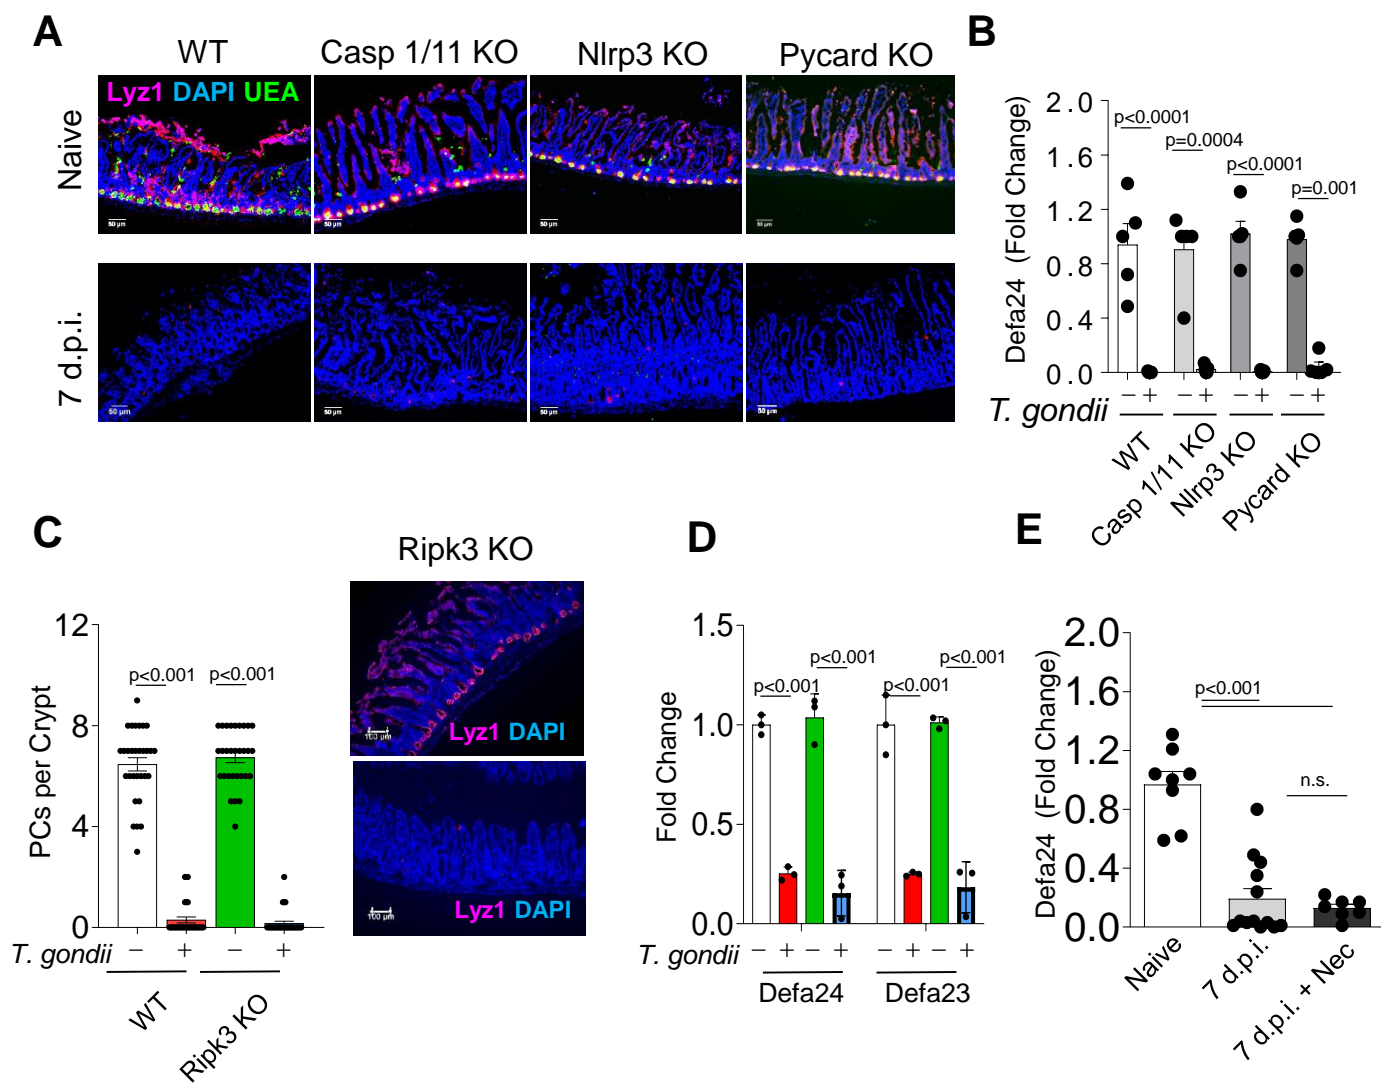

Supplement: supp [file elife-60478-supp-v1.zip]

# Figure 1- figure supplement 1

**A**

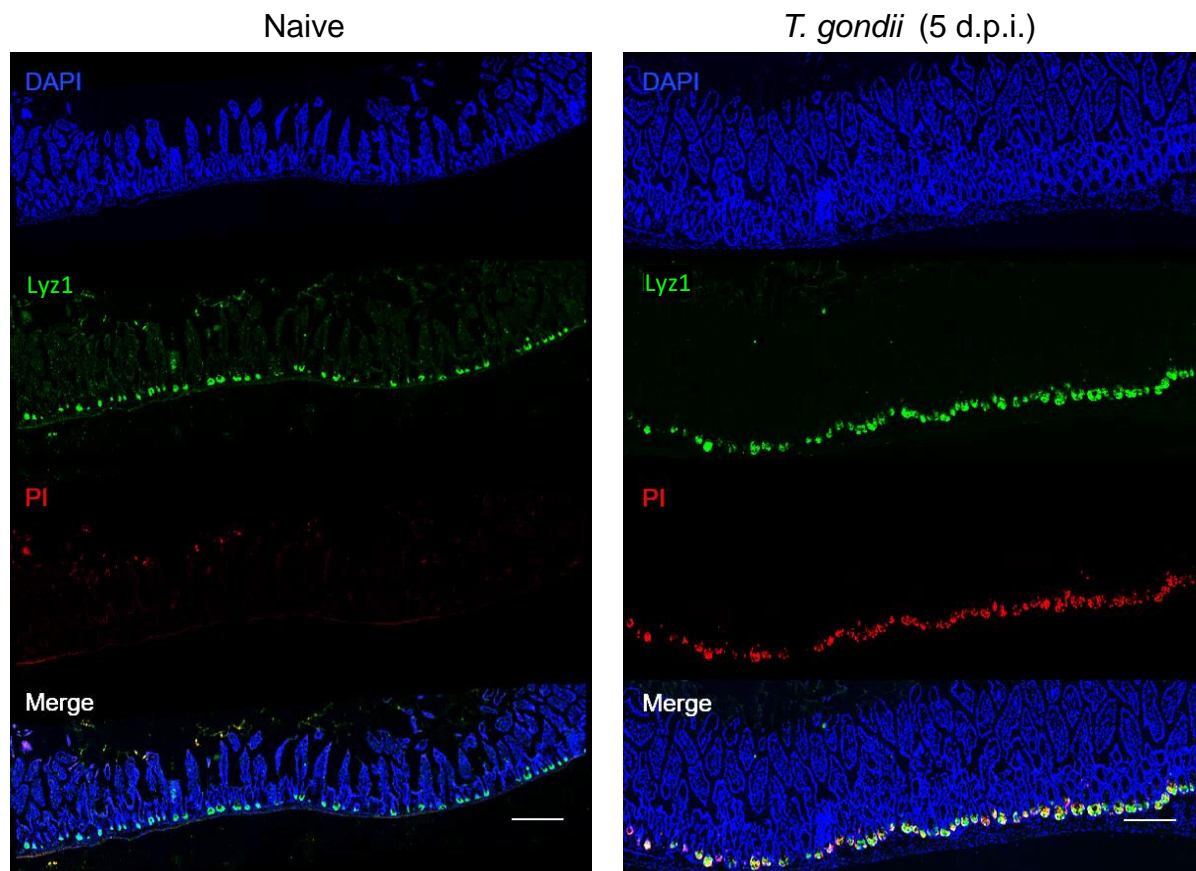

**B**

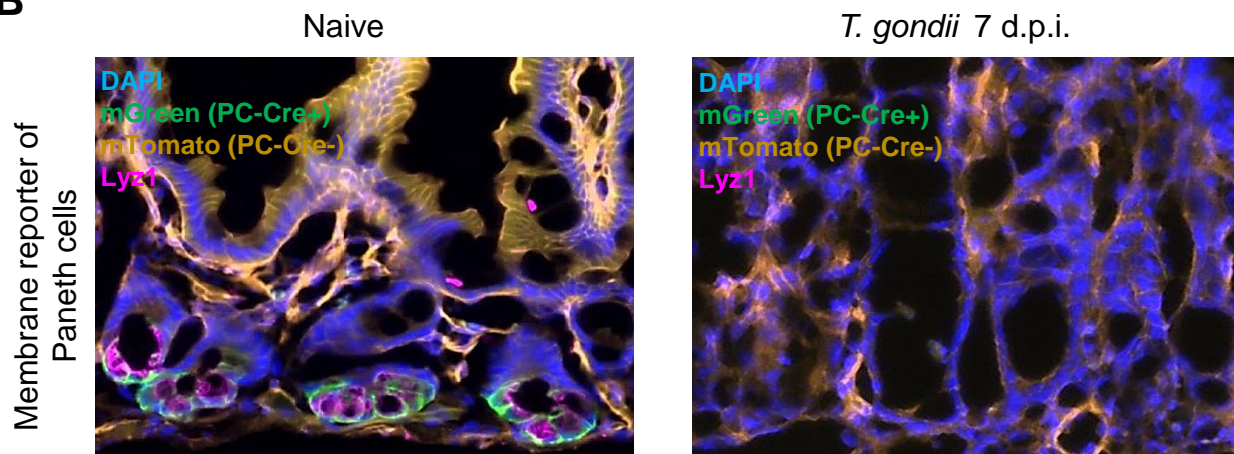

Supplement: supp [file elife-60478-supp-v1.zip]

Figure 2- figure supplement 1

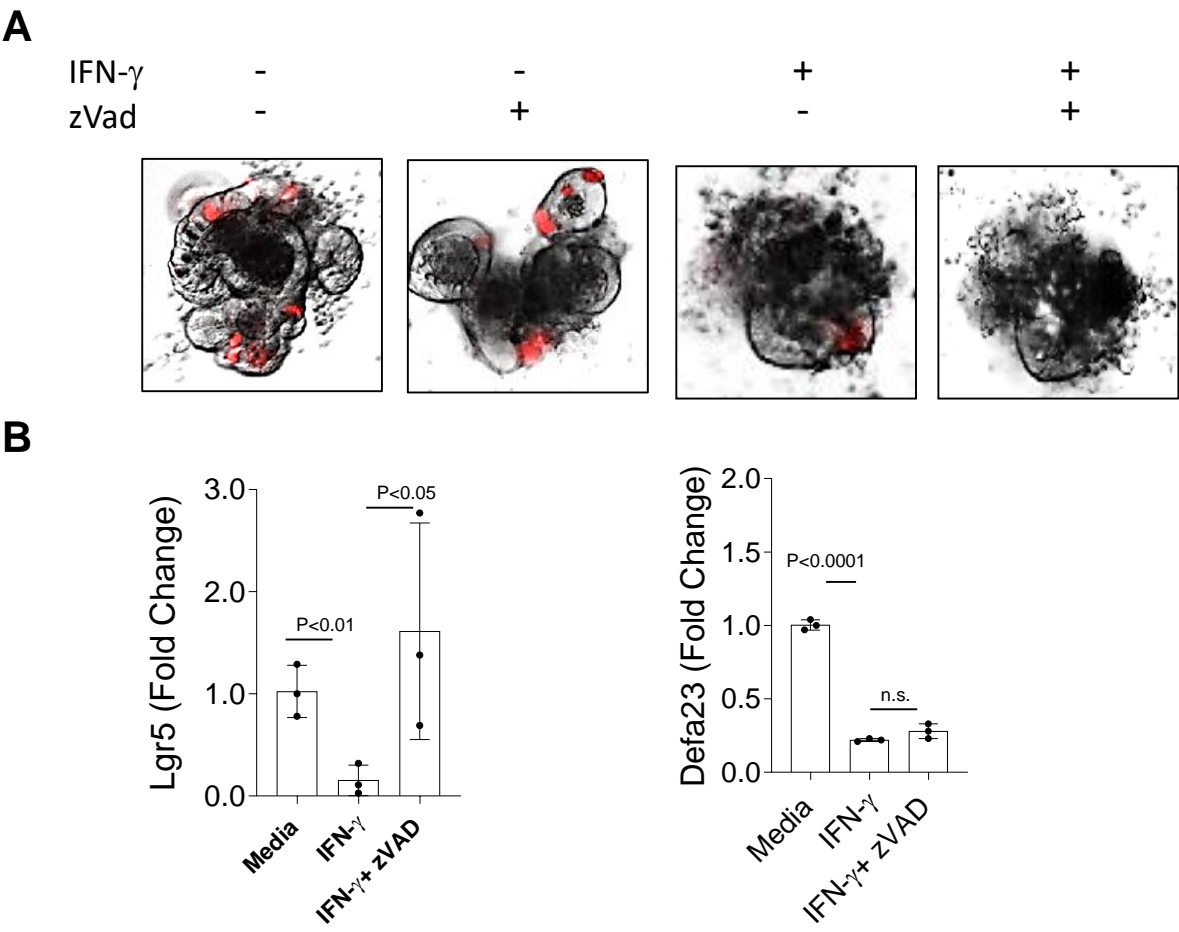

Supplement: supp [file elife-60478-supp-v1.zip]
